# Supplementary material for: A novel “off–on” peptide fluorescent probe for the detection of copper and sulphur ions in living cells
Source: Royal Society of Chemistry journal article supplement (doi:10.1039/d3nj05888c), 2024-01-01
Supplement: d3nj05888c2.pdf [file d3nj05888c2.pdf]

## Supporting Information

A novel "on-off" peptide fluorescent probe for the detection of copper and sulfur ions in living cells

Xue-jiao Wang,<sup>a</sup> Jiang Zhou,<sup>a</sup> Liang-chao Yuan,<sup>b</sup> Jing-cheng Hou,<sup>c</sup> Jiang Wu,<sup>\*a</sup> Peng-cheng Lin<sup>\*a</sup>

- Key Laboratory for Tibet Plateau Phytochemistry of Qinghai Province, College of Pharmacy, Qinghai Minzu University, Xining 810007, Qinghai, P. R. China
- State Key Laboratory of Pharmaceutical Biotechnology, School of Life Sciences, Institute of Artificial Intelligence Biomedicine, Engineering Research Center of Protein and Peptide Medicine, Nanjing University, Nanjing, 210023 P. R. China
- George School 1690 Newtown Langhorne Road, Newtown, PA 18940, USA

**Tab. S1.** Comparison of probes for Cu<sup>2+</sup> assays reported in recent literature.

| Probe                                             | Detection condition                 | Detection limit            | Detection method | cell imaging | Refs.     |
|---------------------------------------------------|-------------------------------------|----------------------------|------------------|--------------|-----------|
| 2',7'-dichlorofluorescein                         | DMSO/HEPES = 1/99 (v/v), and PH 7.4 | 5 nM                       | Turn on          | Yes          | 1         |
| Nitrogen and Fluorine Co-Doped Carbon Dots        | deionized water                     | 347 nM                     | Turn off         | No           | 2         |
| Nitrogen and sulfur doped carbon dots             | aqueous solutions                   | 23.4 nM                    | Turn off         | No           | 3         |
| The hybrid of phenanthraquinone and imidazole dye | DMSO, PBS buffer (PH 7.4)           | —                          | Turn off         | Yes          | 4         |
| Chromone-3-aldehyde                               | THF                                 | 4.93 × 10 <sup>-6</sup> M  | Turn off         | No           | 5         |
| Naphthaldehyde                                    | EtOH: H <sub>2</sub> O (8:2 v/v)    | 9.342 × 10 <sup>-7</sup> M | UV-Vis           | No           | 6         |
| Diarylethene                                      | Acetonitrile                        | 1.76 × 10 <sup>-9</sup> M  | Turn on          | No           | 7         |
| FITC-Ahx-Ser-Ser-His-Thr-Glu-Phe-NH <sub>2</sub>  | PBS solution (10.0 mM, PH 7.4)      | 38.2 nM                    | Turn off         | Yes          | This work |

**Tab. S2.** Comparison of probes for S<sup>2-</sup> assays reported in recent literature.

| Probe                                            | Detection condition                                            | Detection limit         | Detection method | cell imaging | Refs.     |
|--------------------------------------------------|----------------------------------------------------------------|-------------------------|------------------|--------------|-----------|
| Naphthylamine derivatives                        | 30% DMF and 0.1 M PBS buffer                                   | $3.1 \times 10^{-7}$ M  | Turn on          | Yes          | 8         |
| Salamo-based                                     | EtOH/H <sub>2</sub> O (10 : 1)                                 | $3.27 \times 10^{-8}$ M | Turn on          | NO           | 9         |
| Phenyl 2-(benzoylthio) benzoate-based            | 50 mM PBS buffer (pH 7.4) with 100 $\mu$ M cetrimonium bromide | 100 nM                  | Turn on          | Yes          | 10        |
| (Dansyl-Glu-Glu)2-Lys-NH <sub>2</sub>            | 10 mM HEPES buffer solution at PH 7.4                          | 87 nM                   | Turn on          | Yes          | 11        |
| ZnO nanoparticles                                | Methanol/water (1: 99, v/v)                                    | 6.4 nM                  | Turn on          | No           | 12        |
| Phen-anthro[9,10-d]imidazole platform            | DMF/H <sub>2</sub> O solution                                  | 12.3 nM                 | Turn on          | Yes          | 13        |
| Cu (II)-dependent DNAzyme                        | Tris-HCl buffer                                                | 0.2 $\mu$ M             | Turn on          | No           | 14        |
| FITC-Ahx-Ser-Ser-His-Thr-Glu-Phe-NH <sub>2</sub> | PBS solution (10.0 mM, pH 7.4)                                 | 37.9 nM                 | Turn on          | Yes          | This work |

**Tab. S3.** Materials

|    | Reagent name                      | Abbreviated name |
|----|-----------------------------------|------------------|
| 1  | rink amide resin                  | AM               |
| 2  | Fmoc-Phe -OH                      | /                |
| 3  | Fmoc- Thr (Trt)-OH                | /                |
| 4  | Fmoc- His (Trt) - OH              | /                |
| 5  | Fmoc-Ser(tBu)-OH                  | /                |
| 6  | 6-Fmoc-Ahx                        | /                |
| 7  | Fluorescein isothiocyanate isomer | FITC             |
| 8  | 1-hydroxybenzotriazole            | HOBT             |
| 9  | diisopropylethylamine             | DIEA             |
| 10 | trifluoroacetic acid              | TFA              |
| 11 | triisopropylsilane                | TIS              |
| 12 | Piperidine                        | /                |
| 13 | dichloromethane                   | DCM              |

|    |                        |                   |
|----|------------------------|-------------------|
| 14 | N, N-dimethylformamide | DMF               |
| 15 | anisole                | /                 |
| 16 | ethyl ether            | Et <sub>2</sub> O |

**Tab. S4.** Instruments

|   | Experimental project                              | Instrument                                |
|---|---------------------------------------------------|-------------------------------------------|
| 1 | Absorption spectra                                | UV-2550 UV-Visible Spectrophotometer      |
| 2 | Fluorescence spectra                              | F7000 fluorescence spectrometer           |
| 3 | Electrospray ionization MS                        | Waters micromass ZQ2000                   |
| 4 | High performance liquid chromatography separation | Waters ailiance 2695 liquid chromatograph |
| 5 | Cytotoxicity                                      | Infinite M200 PRO                         |
| 6 | cell images                                       | Zeiss LSM 880 confocal microscope         |

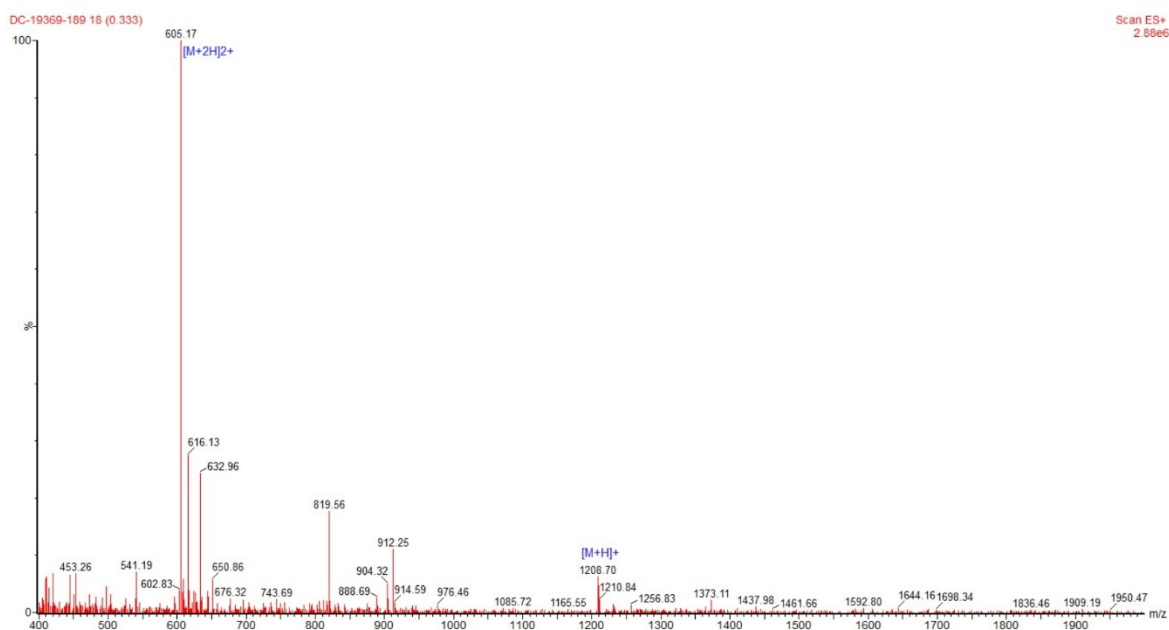

**Fig. S1.** ESI-MS spectrum of FGP1

### HPLC chromatogram of FGP1

Sample ID: FGP1

Sequence: FITC-Ahx-SSHTEF-NH<sub>2</sub>

Column: 4.6\*150 mm, kromasil C18-5

Solvent A: 0.1% Trifluoroacetic in 100% Acetonirile

Solvent B: 0.1% Trifluoroacetic in 100% Water

|           |     |     |
|-----------|-----|-----|
| Gradient: | A   | B   |
| 0.01 min  | 5%  | 95% |
| 25.0 min  | 95% | 5%  |

30.0 min      90%      10%

Flow rate: 1.0 mL/min  
Wavelength: 214 nm  
Volume: 20  $\mu$ L

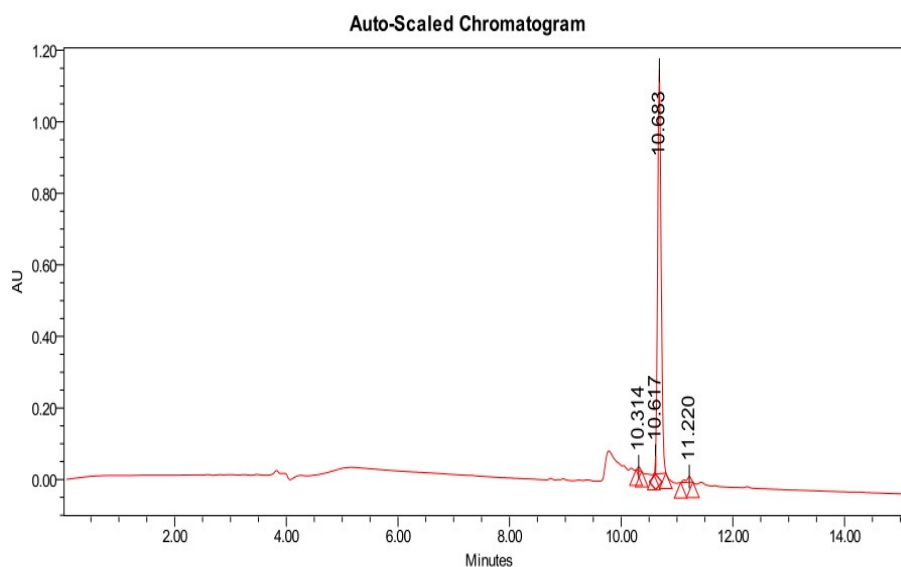

**Fig.S2** HPLC Chromatogram of FGP1

**Tab. S5.** HPLC chromatogram data of FGP1

| Rank | RT     | Area    | Height  | Area% |
|------|--------|---------|---------|-------|
| 1    | 10.314 | 36807   | 10506   | 0.73  |
| 2    | 10.617 | 31020   | 49604   | 0.61  |
| 3    | 10.683 | 4895227 | 1104382 | 96.78 |
| 4    | 11.220 | 95253   | 15536   | 1.88  |

**MS Analysis Report**

Sample ID: FGP1  
Expected MS:1208.1  
Flow rate: 0.2 mL/min  
Run Time: 1 min  
Buffer A: 0.1% HCOOH in water  
Buffer B: 0.1% HCOOH in Acetonirile

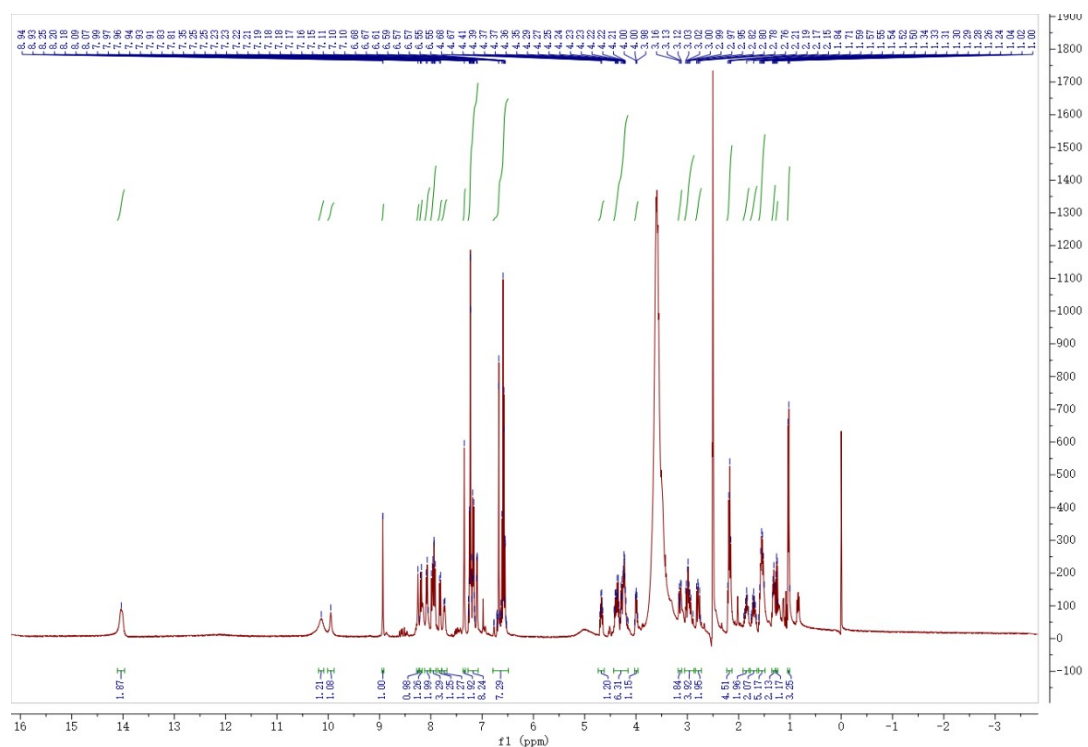

Fig. S3.  $^1\text{H}$  NMR spectrum of FGP1 in  $\text{DMSO}-d_6$ .

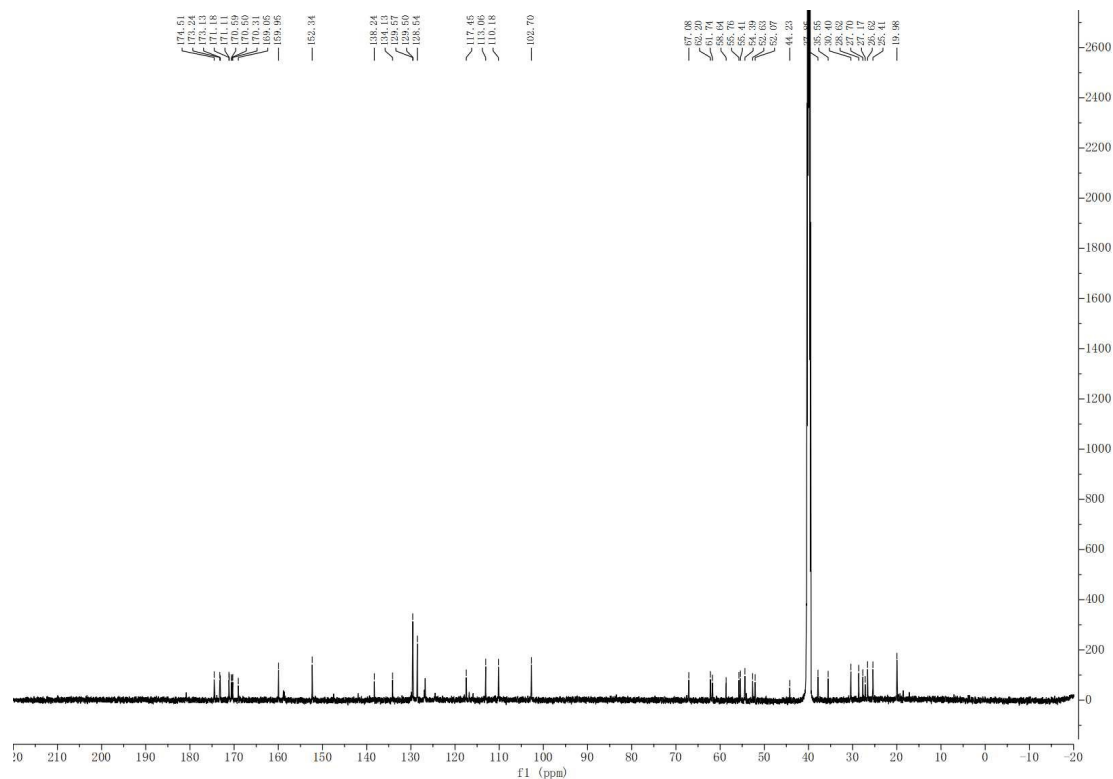

Fig. S4  $^{13}\text{C}$  NMR spectrum of FGP1 in  $\text{DMSO}-d_6$ .

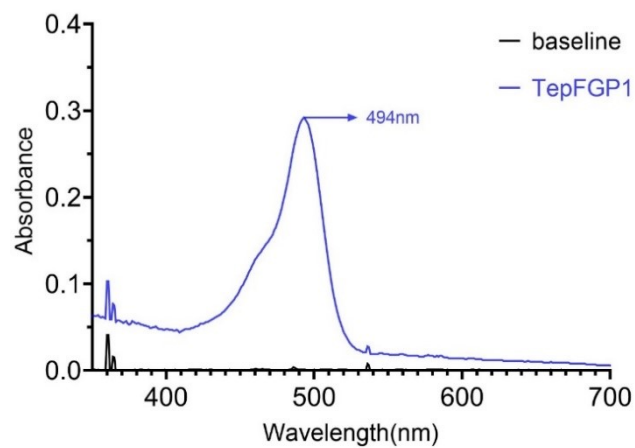

**Fig. S5.** UV absorption spectrum of **FGP1**

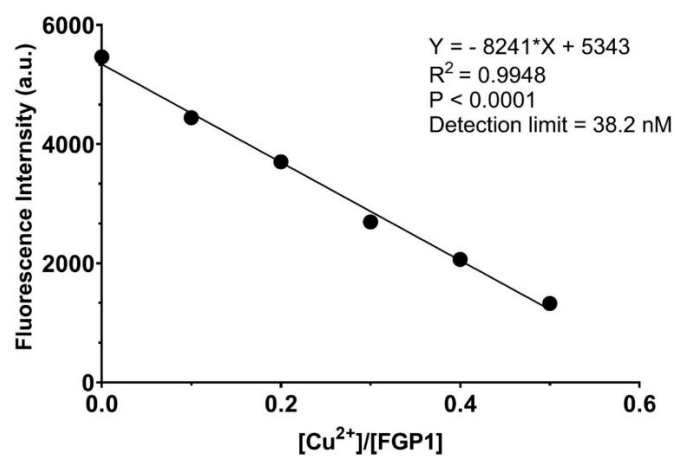

**Fig. S6.** Fluorescence intensity of **FGP1** (10.0 μM) with gradient concentration of Cu<sup>2+</sup> (0-15.0 μM) were added in PBS buffer solutions (10.0 mM, pH 7.4). The lowest detection limit of Cu<sup>2+</sup> was 38.2 nM.

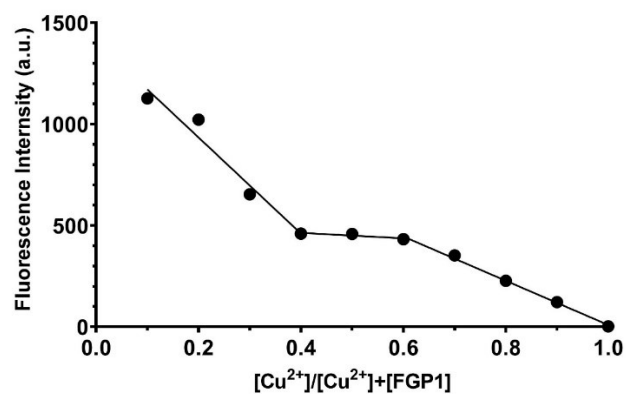

**Fig. S7.** Job's plot for determining the stoichiometry of **FGP1** and Cu<sup>2+</sup> ions.

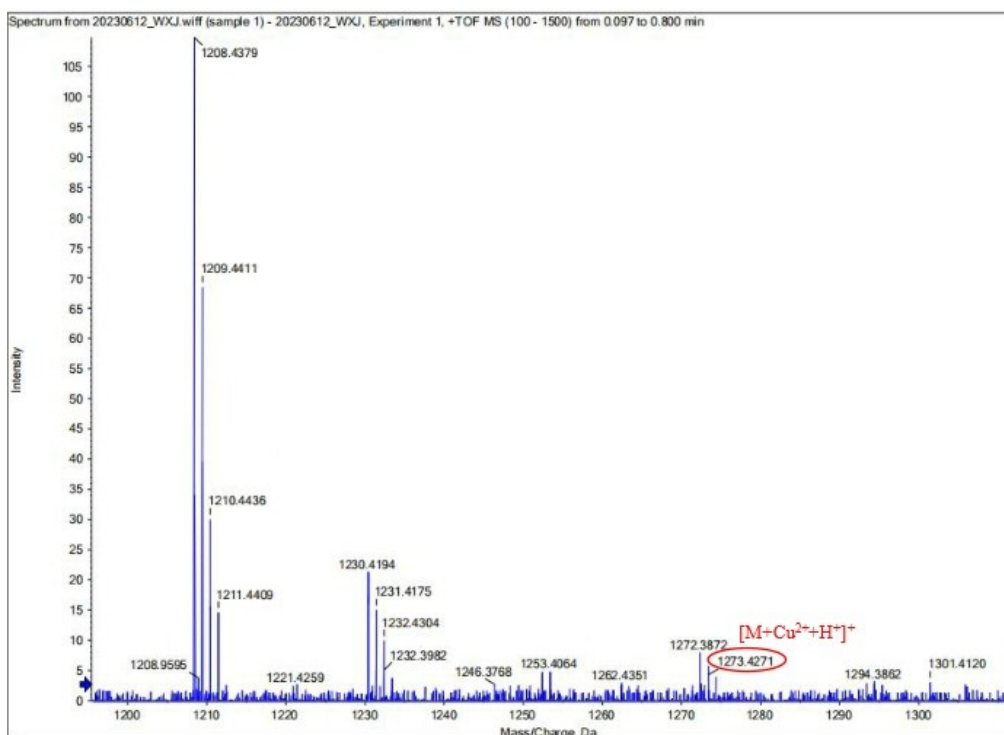

**Fig. S8.** TOF-MS of FGPI (100.0  $\mu\text{M}$ ) with  $\text{Cu}^{2+}$  ions (100.0  $\mu\text{M}$ ) in PBS buffer solutions (10.0 mM, pH 7.4).

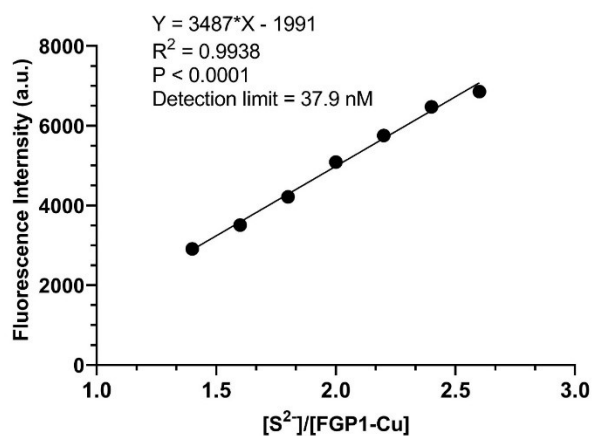

**Fig. S9.** Fluorescence intensity of FGPI-Cu (10.0  $\mu\text{M}$ ) with gradient concentration of  $\text{S}^{2-}$  (0-40.0  $\mu\text{M}$ ) were added in PBS buffer solutions (10.0 mM, pH 7.4). The lowest detection limit of  $\text{S}^{2-}$  was 37.9 nM.

**Fig. S10.** The FTIR spectra of FGP1.

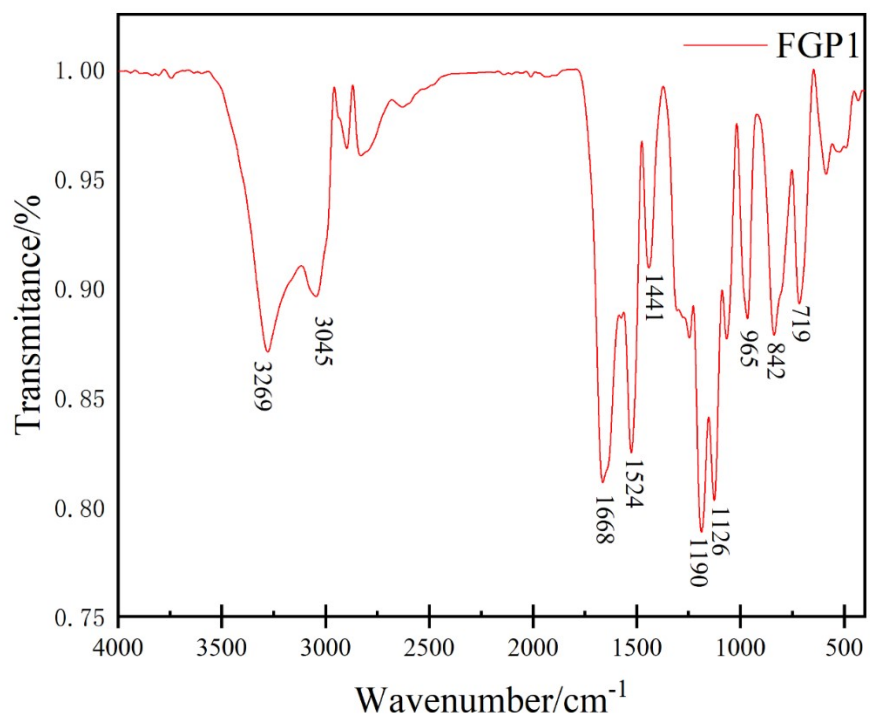



## References

1. M. J. Wei, Y. Y. Zhang, H. T. Li and S. Z. Yao, *Anal. Methods*, 2017, **9**, 3956-3961.
2. H. Wang, J. J. Cui, X. H. Fang, W. B. Zhang, J. J. Wang, S. Y. Chen and J. H. Qian, *Dyes Pigment.*, 2022, **197**, 10.
3. Y. T. Zeng, Z. B. Xu, J. Q. Guo, X. T. Yu, P. F. Zhao, J. Song, J. L. Qu, Y. Chen and H. Li, *Molecules*, 2022, **27**, 13.
4. Y. M. Wang, M. Feng, B. He, X. Y. Chen, J. L. Zeng and J. Sun, *Appl. Surf. Sci.*, 2022, **599**, 10.
5. P. Bhalla, N. Tomer, A. Goel, Monika, A. Ansari and R. Malhotra, *Journal of Molecular Structure*, 2022, 1264.
6. P. Yadav, S. Gond, A. Singh and V. P. Singh, *Mater. Lett.*, 2021, **295**, 4.
7. X. T. Liu, H. L. Liu, X. G. Tang, G. Liu and S. Z. Pu, *Tetrahedron*, 2021, **78**, 8.
8. M. G. Ren, Q. Y. Xu, Y. Y. Bai, S. J. Wang and F. G. Kong, *Spectroc. Acta Pt. A-Molec. Biomolec. Spectr.*, 2021, **249**, 10.
9. Z. L. Wei, L. Wang, S. Z. Guo, Y. Zhang and W. K. Dong, *RSC Adv.*, 2019, **9**, 41298-41304.
10. W. Chen, A. Pacheco, Y. Takano, J. J. Day, K. Hanaoka and M. Xian, *Angewandte Chemie-International Edition*, 2016, **55**, 9993-9996.
11. Y. X. Li, Z. J. Ren, Y. S. Ge, C. X. Di, J. Zhou, J. Wu and L. Jia, *Microchem J.*, 2023, **184**, 7.
12. K. Kaur, S. Chaudhary, S. Singh and S. K. Mehta, *New Journal of Chemistry*, 2015.
13. Y. Q. He, B. Zhao, W. Kan, L. M. Ding, Z. C. Yu, M. Y. Wang, B. Song and L. Y. Wang, *Analyst*, 2020, **145**, 213-222.
14. G. Y. Yue, D. Huang, F. Luo, L. H. Guo and B. Qiu, *Journal of Luminescence*, 2019.
