# Supplementary figures and images for: A novel “off–on” peptide fluorescent probe for the detection of copper and sulphur ions in living cells
Source: Royal Society of Chemistry journal article supplement (doi:10.1039/d3nj05888c), 2024-01-01

### FGP1

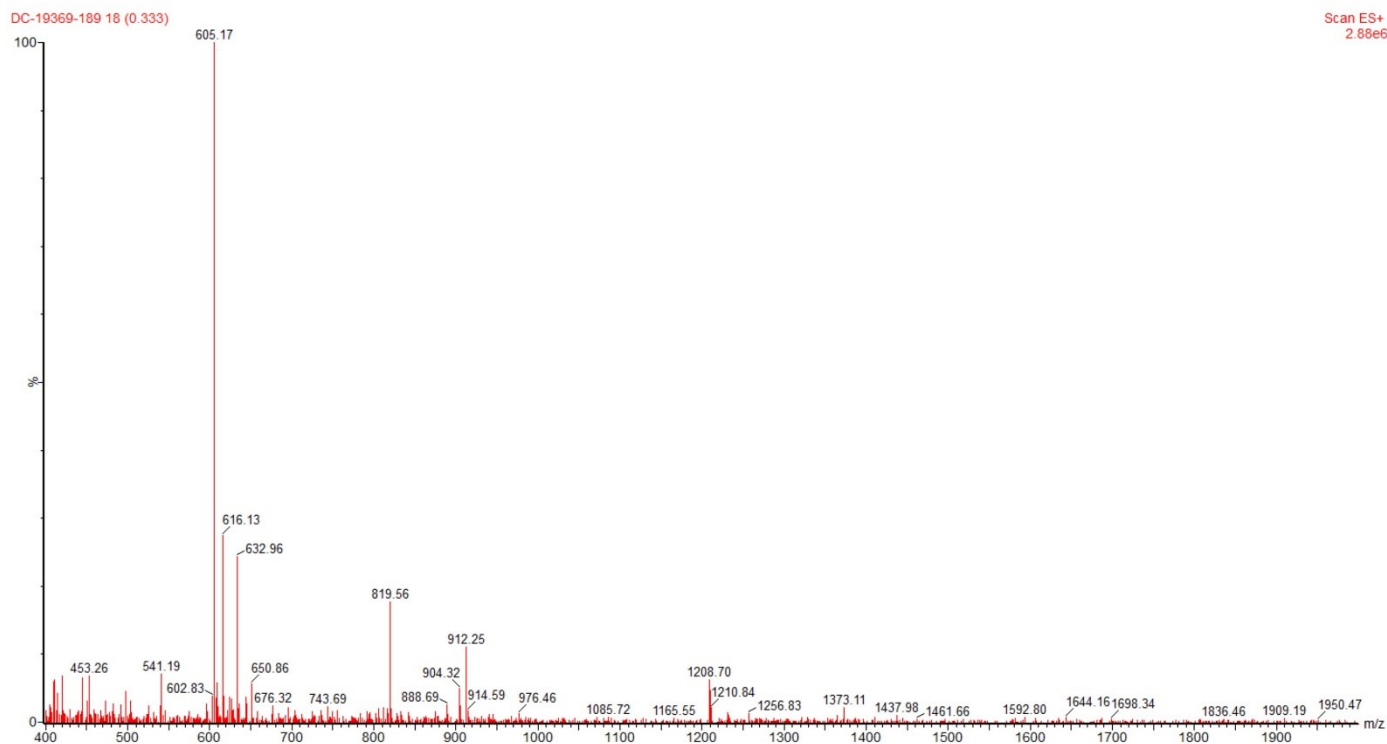

### FGP1+Cu<sup>2+</sup> MS

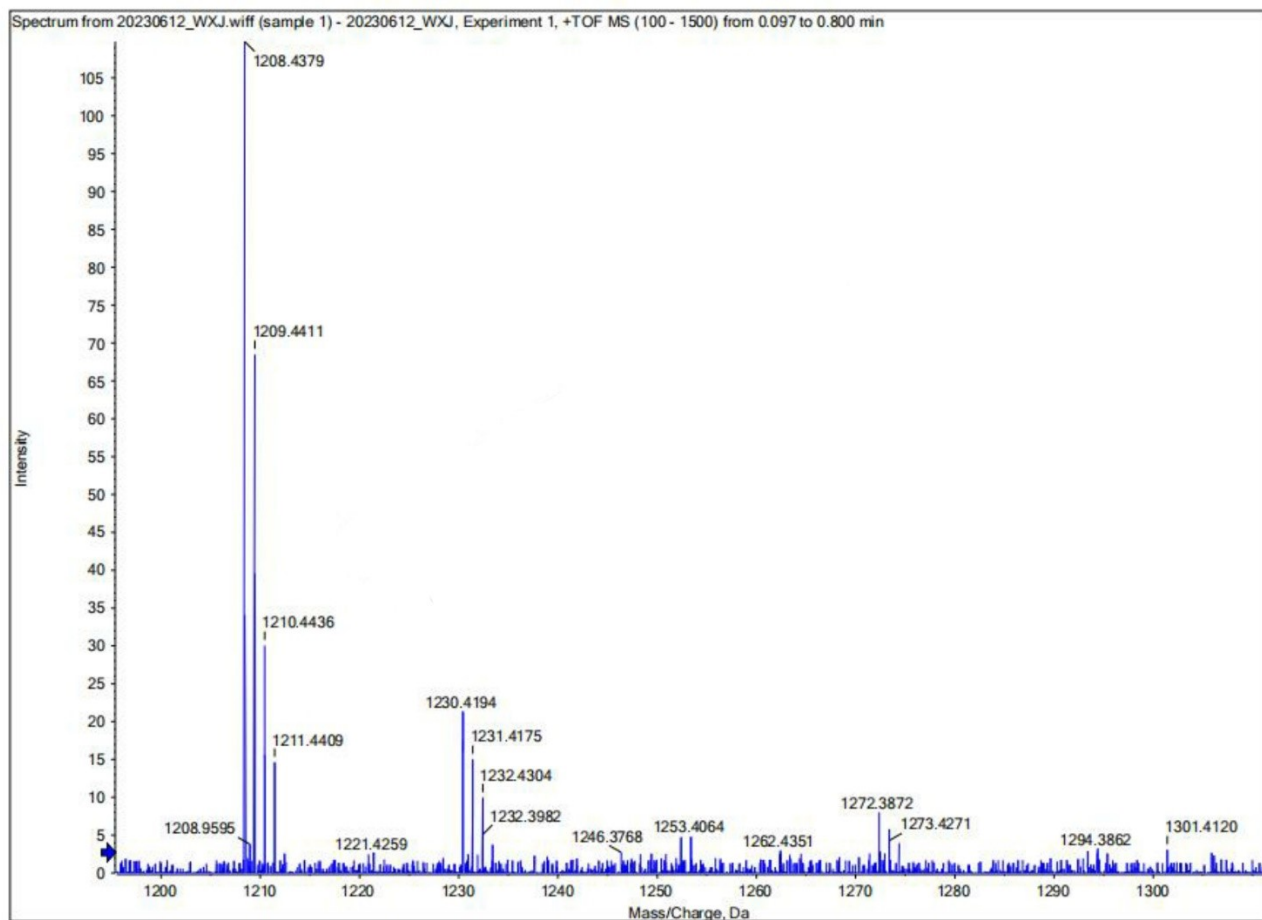

6/12/2023 12:17:08 PM

Supplement: d3nj05888c1.pdf [file d3nj05888c1.pdf]
